# Supplementary material for: TGFβ-Responsive Stromal Activation Occurs Early in Serrated Colorectal Carcinogenesis
Source: MDPI journal article supplement (doi:10.3390/ijms25094626), 2024-04-24
Supplement: s1 [file s1]

**Supplementary Table S1**

| Dataset   | Platform            |                                         | References |
|-----------|---------------------|-----------------------------------------|------------|
| GSE132465 | Single-cell RNA-seq | 47285 single cells from 23 CRC patients | [1]        |
| GSE144735 | Single-cell RNA-seq | 17678 single cells from 6 CRC patients  | [1]        |
| GSE146771 | Single-cell RNA-seq | 5220 single cells from 10 CRC patients  | [2]        |

**Supplementary Table S2**

| Dataset      | Platform                              | Precursor        |              |          | CRC               |         |          |           | References |
|--------------|---------------------------------------|------------------|--------------|----------|-------------------|---------|----------|-----------|------------|
|              |                                       | Total<br>(n=416) | Conventional | Serrated | Total<br>(n=2014) | BRAF-WT | BRAF-Mut | Cell line |            |
| E-MTAB-10089 | Affymetrix Human Genome U133+2.0      | 132              | 132          | 0        | 342               | -       | -        | -         | [3]        |
| GSE41258     | Affymetrix Human Genome U133A         | 51               | 51           | 0        | 194               | -       | -        | 9         | [4]        |
| GSE117606    | Affymetrix HT HG-U133+ PM Array Plate | 69               | 58           | 11       | 74                | -       | -        | -         | [5]        |
| GSE4045      | Affymetrix Human Genome U133A         | 0                | 0            | 0        | 37                | -       | -        | -         | [6]        |
| GSE39582     | Affymetrix Human Genome U133+2.0      | 0                | 0            | 0        | 512               | 461     | 51       | -         | [7]        |
| TCGA         | RNA-seq                               | 0                | 0            | 0        | 453               | 401     | 52       | -         | [8]        |
| Sidra-LUMC   | RNA-seq                               | 0                | 0            | 0        | 275               | 216     | 59       | -         | [9]        |
| GSE39084     | Affymetrix Human Genome U133+2.0      | 0                | 0            | 0        | 70                | 62      | 8        | -         | [10]       |
| CCLE         | RNA-seq                               | 0                | 0            | 0        | 57                | 46      | 11       | 57        | [11]       |
| GSE79460     | Affymetrix HT HG-U133+ PM Array Plate | 16               | 9            | 7        | 0                 | -       | -        | -         | [12]       |
| GSE45270     | Affymetrix Human Genome U133+2.0      | 13               | 7            | 6        | 0                 | -       | -        | -         | [13]       |
| GSE117607    | Affymetrix HT HG-U133+ PM Array Plate | 135              | 126          | 9        | 0                 | -       | -        | -         | [5]        |

**References for Supplementary Tables**

1. Lee, H.O.; Hong, Y.; Etlioglu, H.E.; Cho, Y.B.; Pomella, V.; Van den Bosch, B.; Vanhecke, J.; Verbandt, S.; Hong, H.; Min, J.W.; et al. Lineage-dependent gene expression programs influence the immune landscape of colorectal cancer. *Nat Genet* **2020**, *52*, 594-603, doi:10.1038/s41588-020-0636-z.

2. Zhang, L.; Li, Z.; Skrzypczynska, K.M.; Fang, Q.; Zhang, W.; O'Brien, S.A.; He, Y.; Wang, L.; Zhang, Q.; Kim, A.; et al. Single-Cell Analyses Inform Mechanisms of Myeloid-Targeted Therapies in Colon Cancer. *Cell* **2020**, *181*, 442-459 e429, doi:10.1016/j.cell.2020.03.048.
3. Rohr, M.; Beardsley, J.; Nakkina, S.P.; Zhu, X.; Aljabban, J.; Hadley, D.; Altomare, D. A merged microarray meta-dataset for transcriptionally profiling colorectal neoplasm formation and progression. *Sci Data* **2021**, *8*, 214, doi:10.1038/s41597-021-00998-5.
4. Sheffer, M.; Bacolod, M.D.; Zuk, O.; Giardina, S.F.; Pincas, H.; Barany, F.; Paty, P.B.; Gerald, W.L.; Notterman, D.A.; Domany, E. Association of survival and disease progression with chromosomal instability: a genomic exploration of colorectal cancer. *Proc Natl Acad Sci USA* **2009**, *106*, 7131-7136, doi:10.1073/pnas.0902232106.
5. Chang, K.; Willis, J.A.; Reumers, J.; Taggart, M.W.; San Lucas, F.A.; Thirumurthi, S.; Kanth, P.; Delker, D.A.; Hagedorn, C.H.; Lynch, P.M.; et al. Colorectal premalignancy is associated with consensus molecular subtypes 1 and 2. *Ann Oncol* **2018**, *29*, 2061-2067, doi:10.1093/annonc/mdy337.
6. Laiho, P.; Kokko, A.; Vanharanta, S.; Salovaara, R.; Sammalkorpi, H.; Järvinen, H.; Mecklin, J.P.; Karttunen, T.J.; Tuppurainen, K.; Davalos, V.; et al. Serrated carcinomas form a subclass of colorectal cancer with distinct molecular basis. *Oncogene* **2007**, *26*, 312-320, doi:10.1038/sj.onc.1209778.
7. Marisa, L.; de Reyniès, A.; Duval, A.; Selves, J.; Gaub, M.P.; Vescovo, L.; Etienne-Grimaldi, M.C.; Schiappa, R.; Guenot, D.; Ayadi, M.; et al. Gene expression classification of colon cancer into molecular subtypes: characterization, validation, and prognostic value. *PLoS Med* **2013**, *10*, e1001453, doi:10.1371/journal.pmed.1001453.
8. Cancer Genome Atlas, N. Comprehensive molecular characterization of human colon and rectal cancer. *Nature* **2012**, *487*, 330-337, doi:10.1038/nature11252.
9. Roelands, J.; Kuppen, P.J.K.; Ahmed, E.I.; Mall, R.; Masoodi, T.; Singh, P.; Monaco, G.; Raynaud, C.; de Miranda, N.; Ferraro, L.; et al. An integrated tumor, immune and microbiome atlas of colon cancer. *Nat Med* **2023**, *29*, 1273-1286, doi:10.1038/s41591-023-02324-5.
10. Kirzin, S.; Marisa, L.; Guimbaud, R.; De Reynies, A.; Legrain, M.; Laurent-Puig, P.; Cordelier, P.; Pradère, B.; Bonnet, D.; Meggetto, F.; et al. Sporadic early-onset colorectal cancer is a specific sub-type of cancer: a morphological, molecular and genetics study. *PLoS One* **2014**, *9*, e103159, doi:10.1371/journal.pone.0103159.
11. Ghandi, M.; Huang, F.W.; Jane-Valbuena, J.; Kryukov, G.V.; Lo, C.C.; McDonald, E.R., 3rd; Barretina, J.; Gelfand, E.T.; Bielski, C.M.; Li, H.; et al. Next-generation characterization of the Cancer Cell Line Encyclopedia. *Nature* **2019**, *569*, 503-508, doi:10.1038/s41586-019-1186-3.
12. Fessler, E.; Drost, J.; van Hooft, S.R.; Linnekamp, J.F.; Wang, X.; Jansen, M.; De Sousa, E.M.F.; Prasetyanti, P.R.; JE, I.J.; Franitza, M.; et al. TGFbeta signaling directs serrated adenomas to the mesenchymal colorectal cancer subtype. *EMBO Mol Med* **2016**, *8*, 745-760, doi:10.15252/emmm.201606184.
13. De Sousa E Melo, F.; Wang, X.; Jansen, M.; Fessler, E.; Trinh, A.; de Rooij, L.P.; de Jong, J.H.; de Boer, O.J.; van Leersum, R.; Bijlsma, M.F.; et al. Poor-prognosis colon cancer is defined by a molecularly distinct subtype and develops from serrated precursor lesions. *Nat Med* **2013**, *19*, 614-618, doi:10.1038/nm.3174.
